# Supplementary material
Source: publisher site journal article supplement (https://www.dovepress.com/article/544362)
Supplement: Supplementary file 1 [file appendix%20file_1.docx]

**TableA** The P-value during the identification of confounding variables

| Variable | Perceived quality of life | Perceived satisfaction of health | Depression | Stigma | ART adherence | Viral load | CD4 | Condom use | Multiple partners |
| --- | --- | --- | --- | --- | --- | --- | --- | --- | --- |
| Age |  | 0.028 | 0.001 |  | 0.006 | <0.001** | 0.016 |  |  |
| Ethnicity |  |  |  |  |  | 0.035 |  |  |  |
| Gender |  |  |  |  |  | 0.018 |  |  | 0.013 |
| Education | 0.001 |  |  |  |  | 0.001 |  |  |  |
| Religion belief | 0.018 |  |  |  |  |  |  |  |  |
| Marital status |  |  | 0.001 |  |  |  |  |  | <0.001** |
| Employment status | <0.001** | 0.013 | 0.011 |  |  |  |  |  |  |
| Sexual orientation | 0.031 | 0.004 | <0.001** |  | 0.002 |  |  |  | <0.001** |
| Alcohol |  |  | <0.001** |  | <0.001** |  |  |  |  |
| Drugs |  |  |  |  |  |  |  |  |  |
| Other STIs |  | 0.004 | 0.013 |  |  |  |  |  |  |
| ART initiation |  | 0.021 |  |  | NA | <0.001** |  |  |  |
| Residence |  |  |  |  |  | 0.014 | 0.049 | 0.025 |  |
| HIV duration |  | <0.001** |  |  | <0.001** | <0.001** | <0.001** | 0.003 | 0.002 |

Note：***p* <.001

This tablel was a supplementary explanatory document and it displayed the p values of the association of the sociodemographic and clinical characteristics with risk sexual behavior and health indicators
